## Behavioural and neurophysiological responses of an insect to changing ratios of constituents in host plant-derived volatile mixtures

A. J. Najjar-Rodriguez, C. G. Galizia, J. Stierle and S. Dorn

10.1242/jeb.054262

There was an error published in *J. Exp. Biol.* **213**, 3388-3397.

In the text of this paper, the proportions of two compounds in the plant-derived volatile mixture tested, i.e. (*E*)-2-hexenal and benzaldehyde, were inadvertently exchanged.

In the second paragraph of the 'Chemicals and mixtures' section on p. 3389, it is stated that the mixture mimicking bioactive peach shoot volatiles was composed of (*Z*)-3-hexenyl acetate, (*Z*)-3-hexen-1-ol, (*E*)-2-hexenal, benzaldehyde and benzonitrile, at ratios of 69.74:14.62:13.24:2.25:0.15 vol./vol., respectively. The proportions of the compounds in the mixture should read: 69.74:14.62:2.25:13.24:0.15 vol./vol.

The authors apologize for this error but confirm that the correct proportions of compounds were used throughout the study and therefore results and conclusions remain unaffected.
